# Supplementary material for: Improved reaction conditions for the synthesis of new NKP-1339 derivatives and preliminary investigations on their anticancer potential
Source: Royal Society of Chemistry journal article supplement (doi:10.1039/c4dt01645a), 2014-11-11
Supplement: c4dt01645a1.pdf [file c4dt01645a1.pdf]

**Supporting Information**

**Improved reaction conditions for the synthesis of new NKP-1339 derivatives and preliminary investigations on their anticancer potential**

P.-S. Kuhn,<sup>a</sup> V. Pichler,<sup>a,b</sup> A. Roller,<sup>a</sup> M. Hejl,<sup>a</sup> M. A. Jakupec,<sup>a,b</sup> W. Kandioller,<sup>\*a,b</sup> and B. K. Keppler<sup>a,b</sup>

<sup>a</sup> Institute of Inorganic Chemistry, Faculty of Chemistry, University of Vienna, Währinger Str. 42, 1090 Vienna, Austria. E-mail: [wolfgang.kandioller@univie.ac.at](mailto:wolfgang.kandioller@univie.ac.at)

<sup>b</sup> Research Platform “Translational Cancer Therapy Research”, University of Vienna, Währinger Str. 42, 1090 Vienna, Austria.

## Table of Content

Figure S1. <sup>1</sup>H-NMR spectrum of **1**.

Figure S2. <sup>1</sup>H-NMR spectrum of **3**.

Figure S3. <sup>1</sup>H-NMR spectrum of **5**.

Figure S4. Cyclic voltammogram of **1** displaying the Ru<sup>IV</sup>/Ru<sup>III</sup> redox couple.

Figure S5. Cyclic voltammogram of **2**.

Figure S6. Cyclic voltammogram of **2** displaying the Ru<sup>IV</sup>/Ru<sup>III</sup> redox couple.

Figure S7. Cyclic voltammogram of **3**.

Figure S8. Cyclic voltammogram of **3** displaying the Ru<sup>IV</sup>/Ru<sup>III</sup> redox couple.

Figure S9. UV-vis spectra of **3** at 25 °C at pH 3.5 and 7.

Figure S10. <sup>1</sup>H NMR spectra of **4** in D<sub>2</sub>O over 80 min.

Figure S11. ESI-MS spectrum (pos. ion mode) of **3** after 2 h in aqueous solution.

Figure S12. Concentration-effect curves of **3–6**.

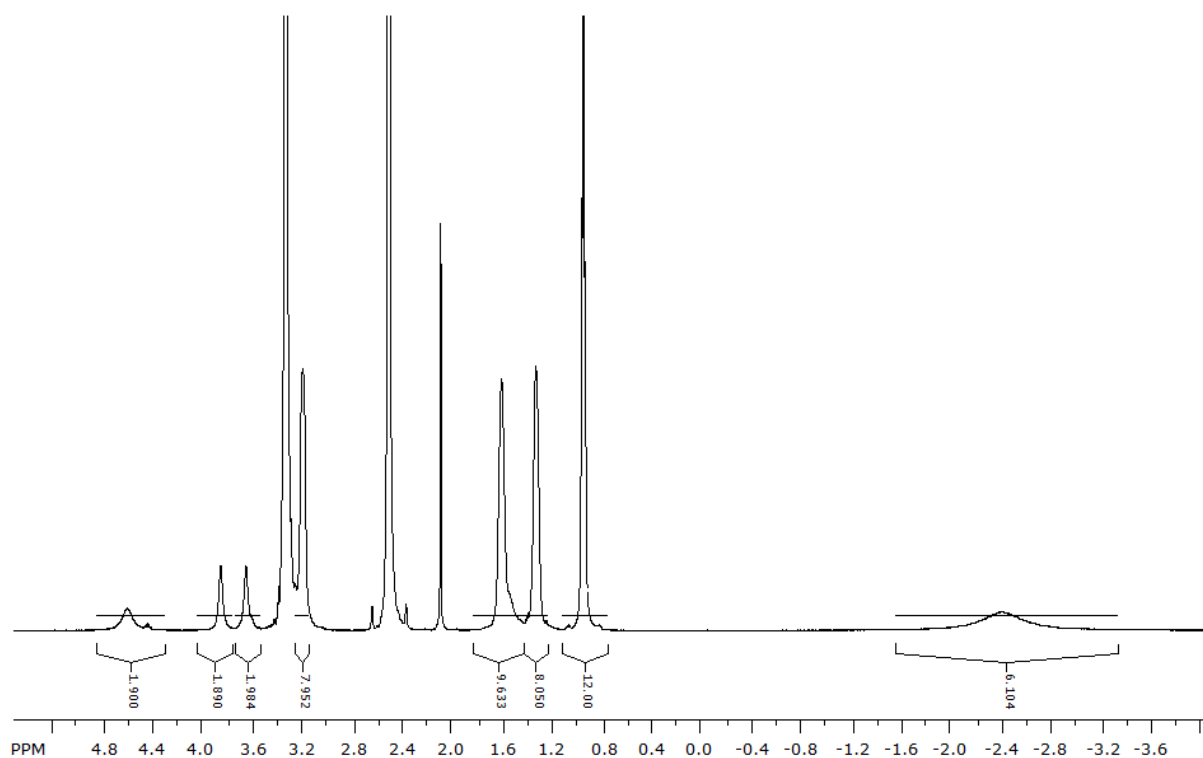

**Figure S1.** <sup>1</sup>H-NMR spectrum of (Bu<sub>4</sub>N)-*trans*-[RuCl<sub>4</sub>(1-Me-ind)<sub>2</sub>] (1) in DMSO-d<sub>6</sub>.

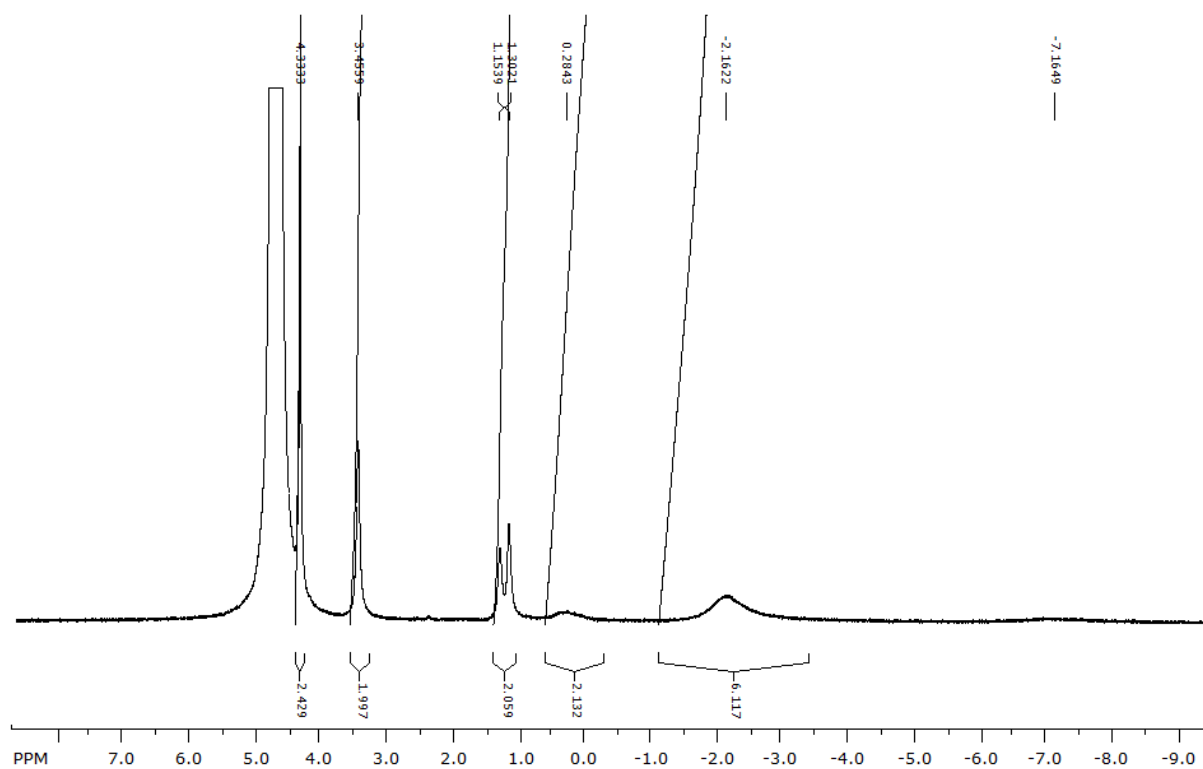

**Figure S2.** <sup>1</sup>H-NMR spectrum of Na-*trans*-[RuCl<sub>4</sub>(1-Me-ind)<sub>2</sub>] (3) in D<sub>2</sub>O.

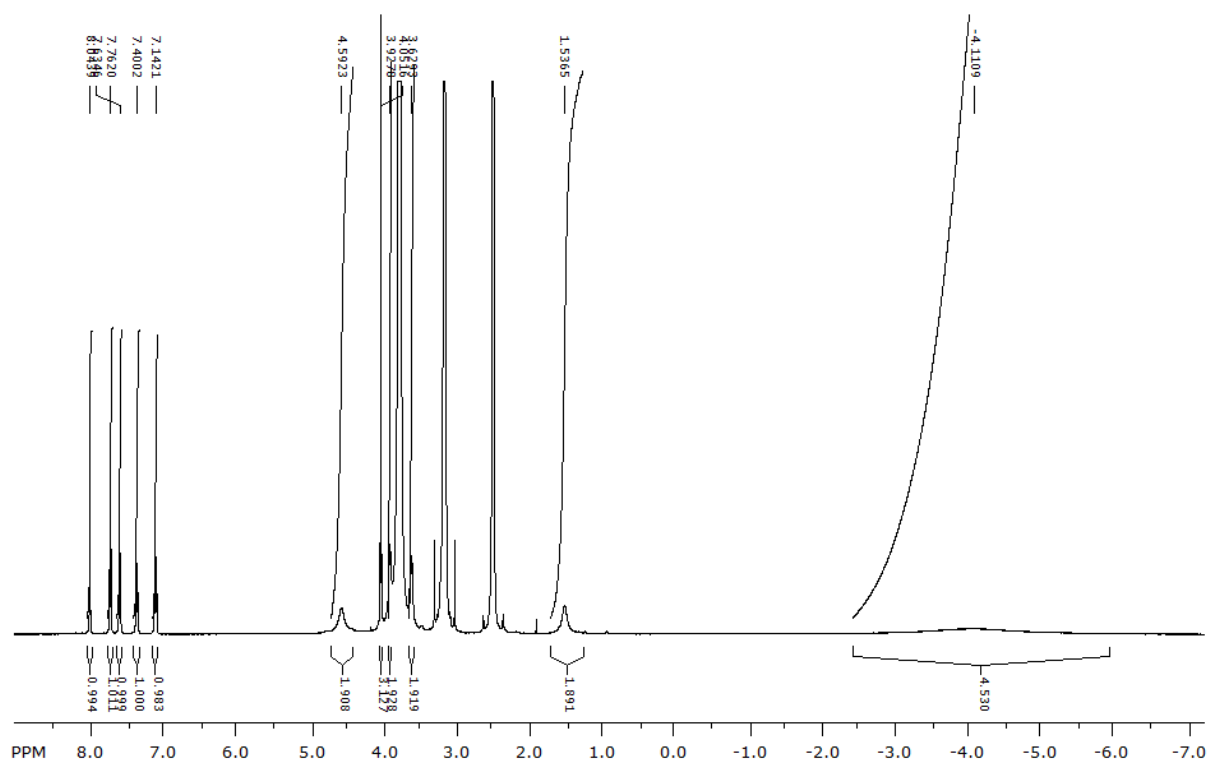

**Figure S3.**  $^1\text{H-NMR}$  spectrum of (1-Me-Hind)-*trans*- $[\text{RuCl}_4(1\text{-Me-ind})_2]$  (**5**) in  $\text{DMSO-d}_6$ .

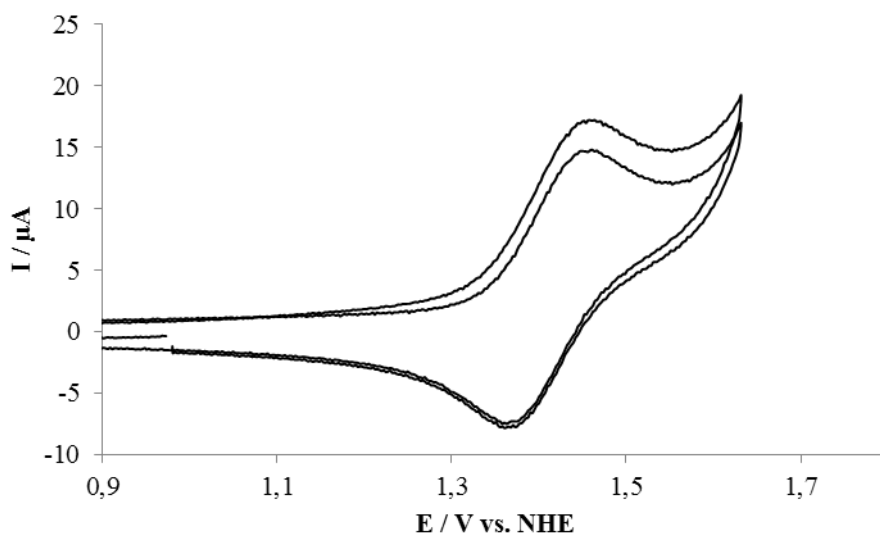

**Figure S4.** Cyclic voltammograms of **1** in DMSO containing 0.10 M  $(n\text{-Bu}_4\text{N})[\text{BF}_4]$  at a scan rate of  $0.20 \text{ V}\cdot\text{s}^{-1}$  using a glassy carbon working electrode, displaying the  $\text{Ru}^{\text{IV}}/\text{Ru}^{\text{III}}$  redox couple.

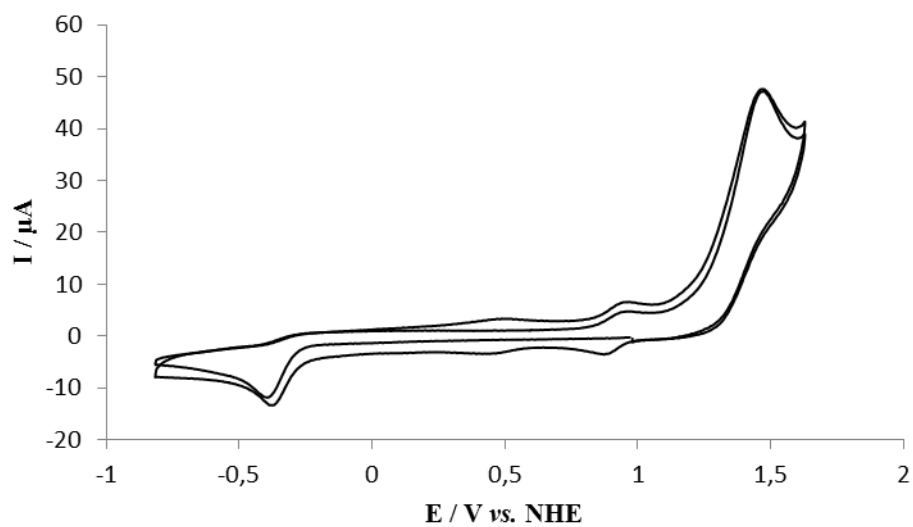

**Figure S5.** Cyclic voltammograms of **2** in DMSO containing 0.10 M (*n*-Bu<sub>4</sub>N)[BF<sub>4</sub>] at a scan rate of 0.20 V·s<sup>-1</sup> using a glassy carbon working electrode.

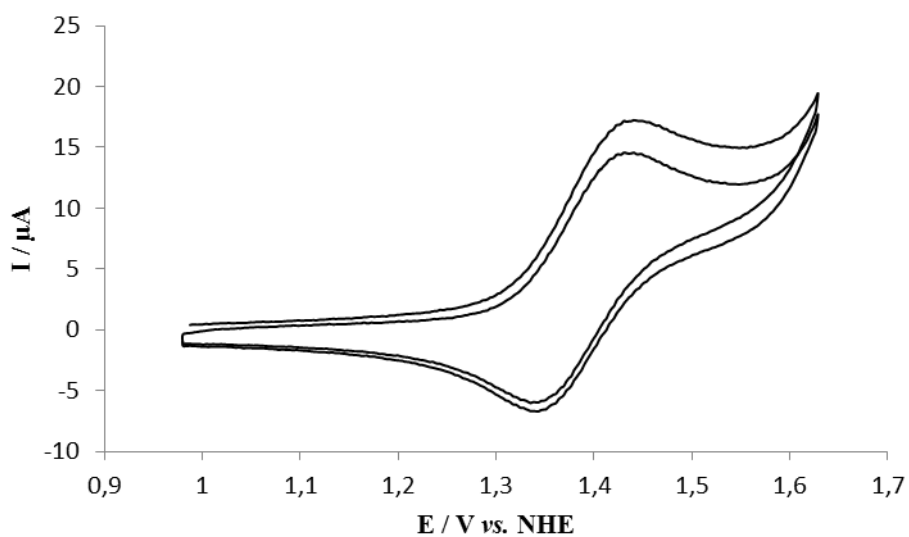

**Figure S6.** Cyclic voltammograms of **2** in DMSO containing 0.10 M (*n*-Bu<sub>4</sub>N)[BF<sub>4</sub>] at a scan rate of 0.20 V·s<sup>-1</sup> using a glassy carbon working electrode, displaying the Ru<sup>IV</sup>/Ru<sup>III</sup> redox couple.

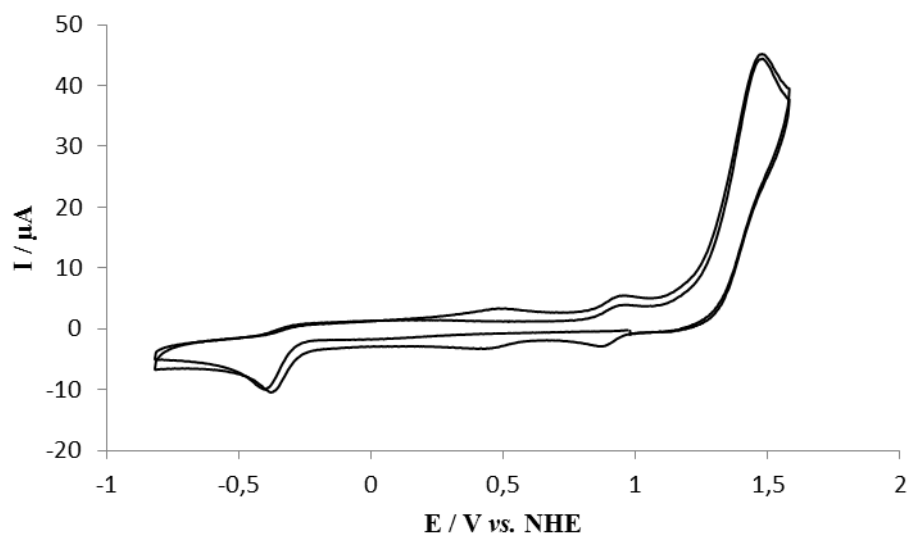

**Figure S7.** Cyclic voltammograms of **3** in DMSO containing 0.10 M (*n*-Bu<sub>4</sub>N)[BF<sub>4</sub>] at a scan rate of 0.20 V·s<sup>-1</sup> using a glassy carbon working electrode.

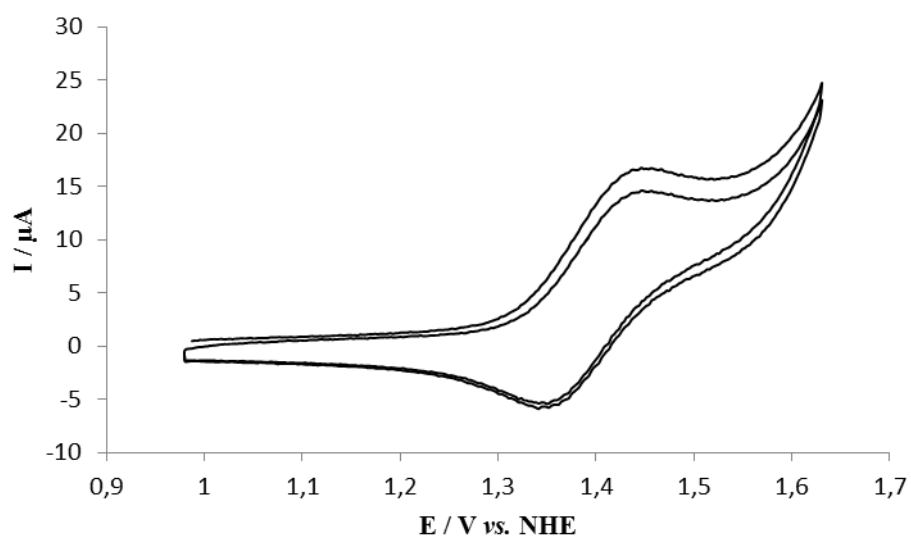

**Figure S8.** Cyclic voltammograms of **3** in DMSO containing 0.10 M (*n*-Bu<sub>4</sub>N)[BF<sub>4</sub>] at a scan rate of 0.20 V·s<sup>-1</sup> using a glassy carbon working electrode, displaying the Ru<sup>IV</sup>/Ru<sup>III</sup> redox couple.

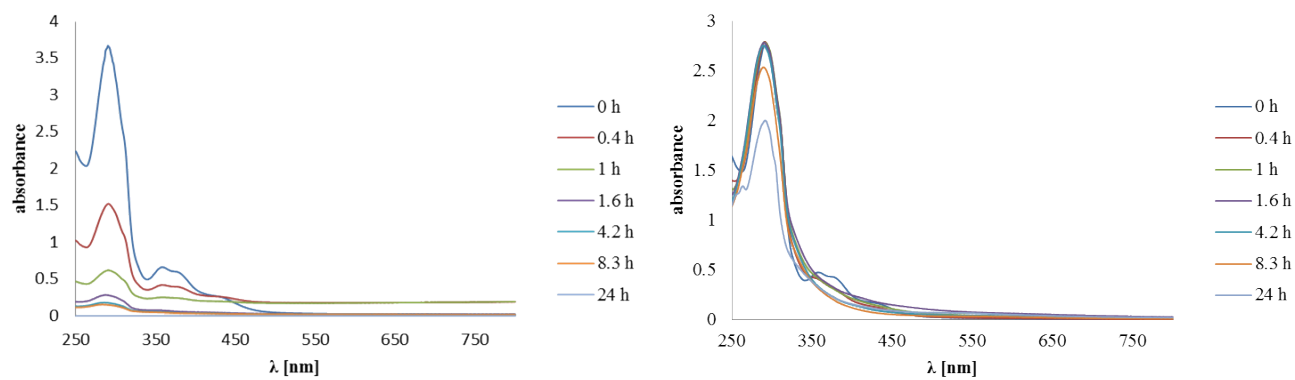

**Figure S9.** UV-vis spectra of **3** in water at 25 °C at pH 3.5 (left) and pH 7 (right).

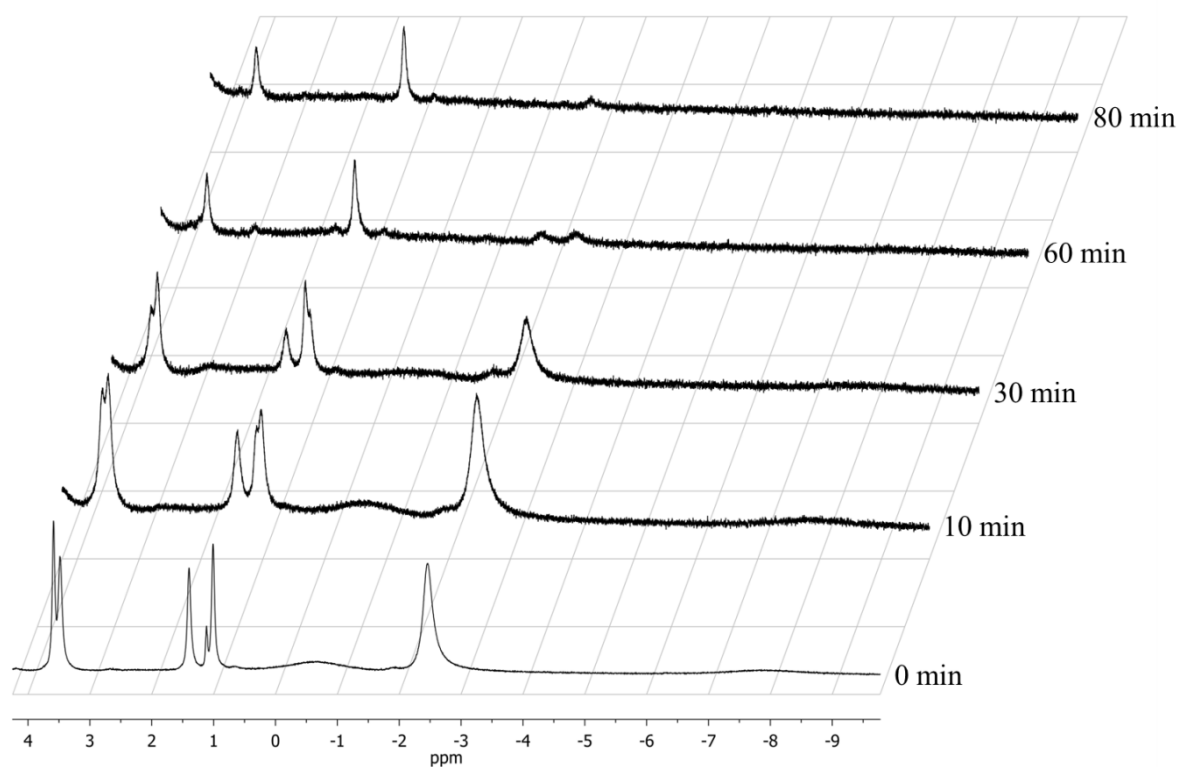

**Figure S10.**  $^1\text{H}$  NMR spectra of **4** in  $\text{D}_2\text{O}$  over 80 min at neutral pH. Resolution of the NMR spectra decreased over time, due to precipitation of the hydrolysis products.

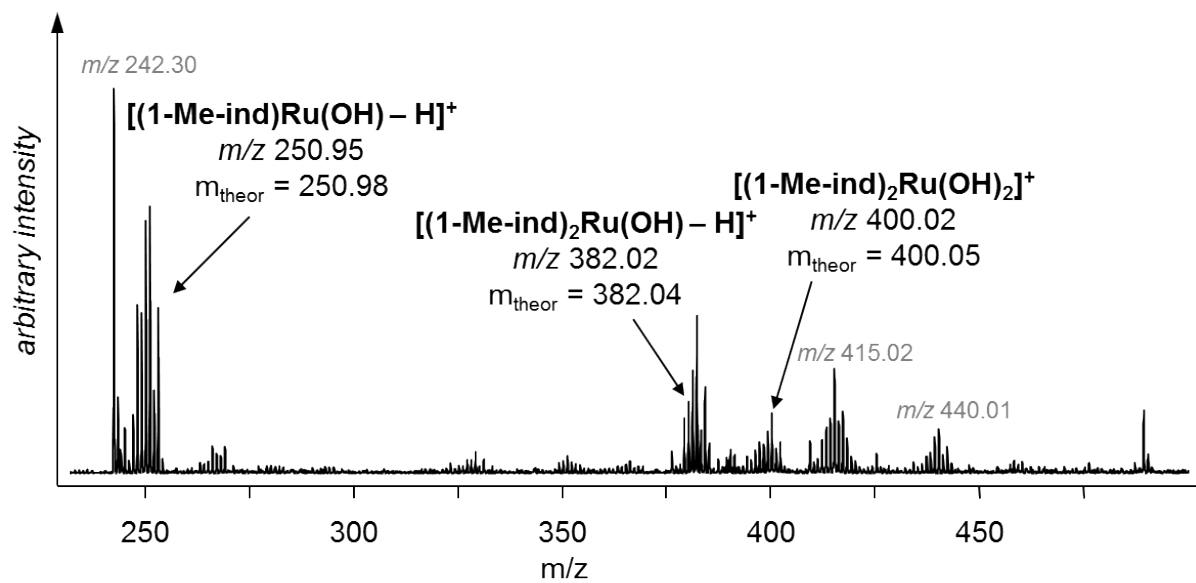

**Figure S11.** Excerpt of the mass spectrum in the positive ion mode of **3** after 2 h in aqueous solution. Hydroxido species stemming from hydrolysis processes are labelled.



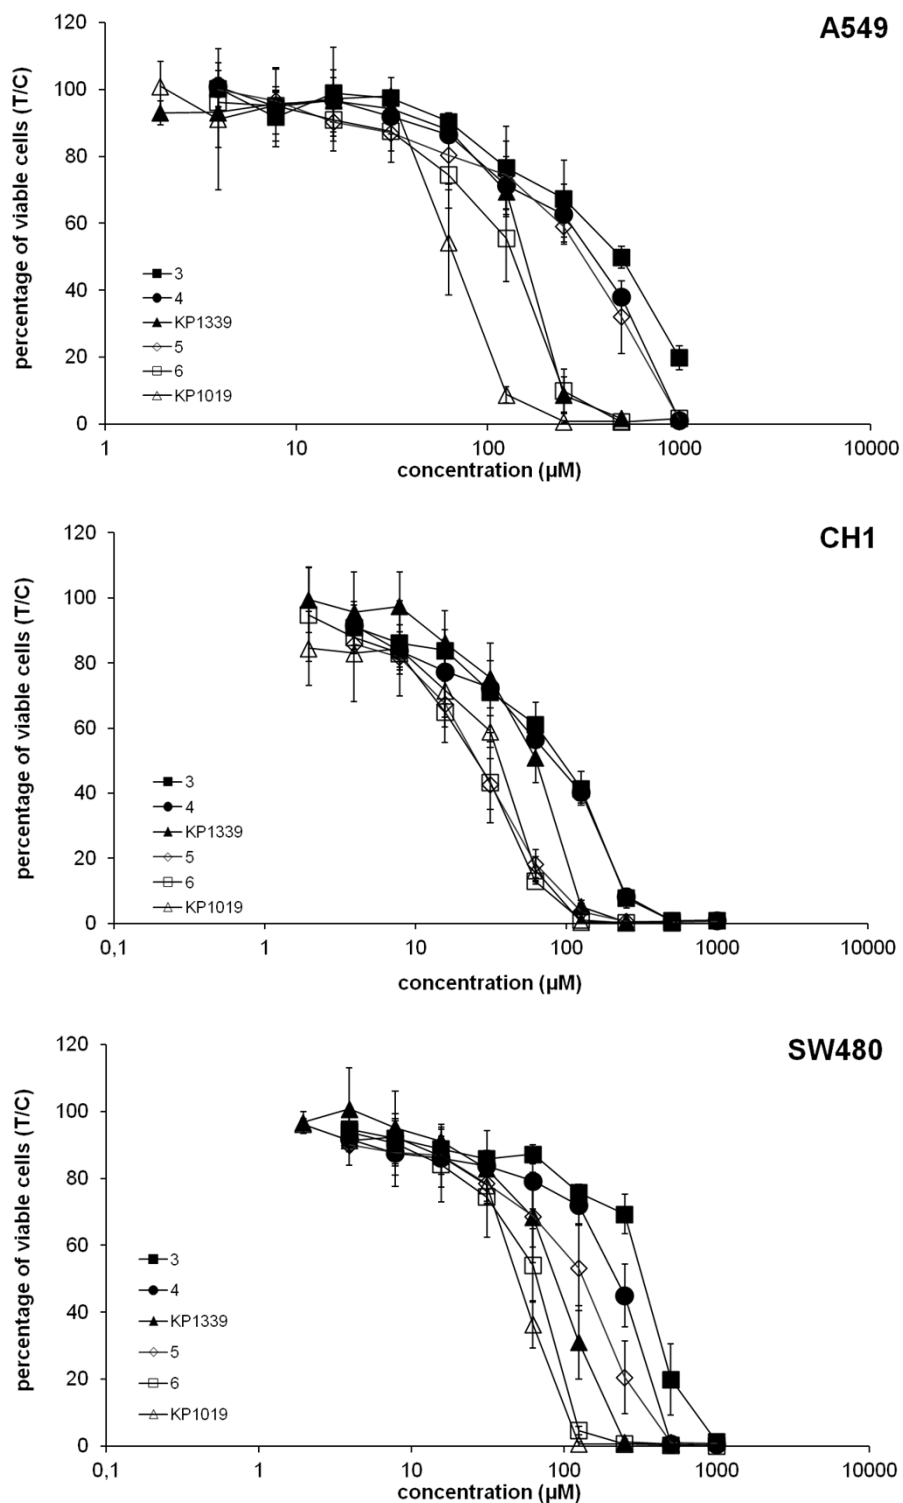

**Figure S12.** Concentration-effect curves of complexes 3–6 and the reference compounds KP1339 and KP1019 in three human cancer cell lines (A549, CH1, and SW480) obtained by the MTT assay (96 h exposure).
